# Supplementary material for: Mediterranean nascent sea spray organic aerosol and relationships with seawater biogeochemistry
Source: Copernicus journal article supplement (doi:10.5194/acp-2020-406), 2020-06-23
Supplement: Supplementary file 1 [file acp-2020-406-supplement.pdf]

## Supplementary material

## Mediterranean nascent sea spray organic aerosol and relationships with seawater biogeochemistry

Evelyn Freney<sup>1</sup>, Karine Sellegri<sup>1\*</sup>, Alessia Nicosia<sup>1</sup>, Jonathan T. Trueblood<sup>1</sup>, Matteo. Rinaldi<sup>3</sup>, Leah. R. Williams<sup>4</sup>, André. S. H. Prévôt<sup>5</sup>, Melilotus Thyssen<sup>6</sup>, Gérald Grégori<sup>6</sup>, Nils Haëntjens<sup>7</sup>, Julie Dinasquet<sup>8,9\*</sup>, Ingrid Obernosterer<sup>9</sup>, France Van-Wambeke<sup>6</sup>, Anja Engel<sup>10</sup>, Birthe Zäncker<sup>10</sup>, Karine Desboeufs<sup>11</sup>, Eija Asmi<sup>2</sup>, Hilka Timmonen<sup>2</sup>, Cécile Guieu<sup>12</sup>

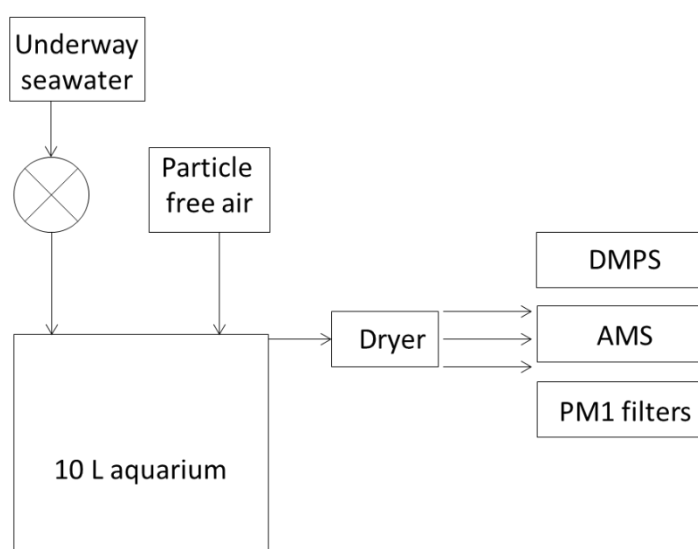

Figure S1. Schematic of sampling set up.

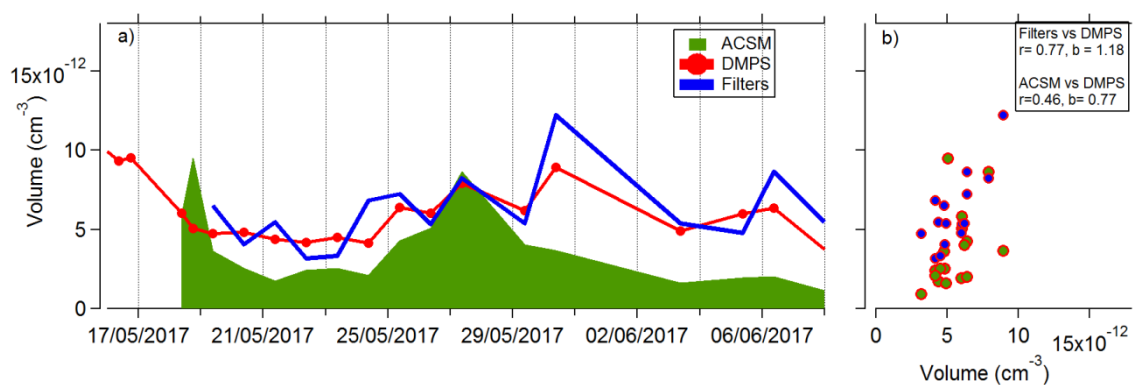

Figure S2: Comparison of volume concentrations obtained from offline filters, DMPS, and ToF-ACSM as a) a function of time and b) comparing concentrations of filters and ACSM with those of the DMPS in a scatter plot.

**Positive matrix factorization (PMF)**

Pearsons correlation of the different PMF solutions mass spectral profiles with the reference mass spectra of interest for 3, 4, and 5 factor solutions.

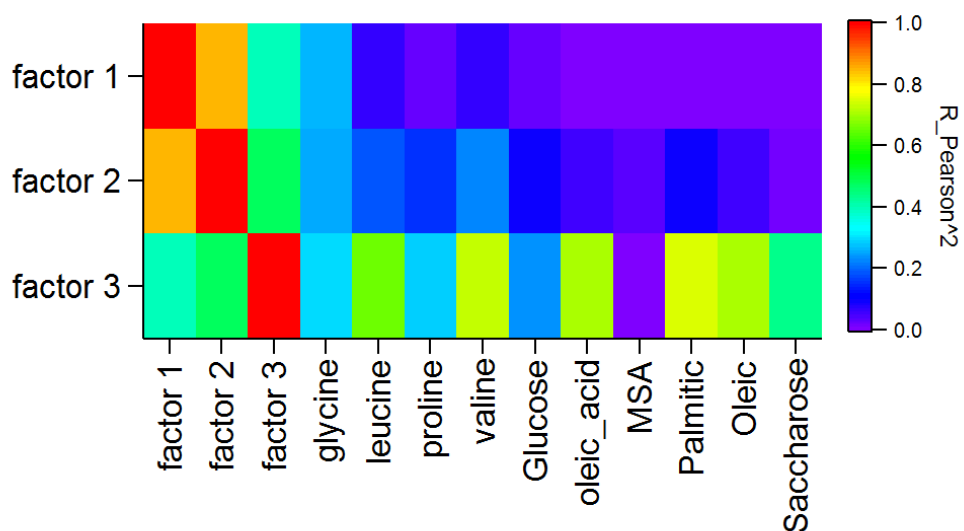

Figure S3: A three factor solution and the corresponding mass spectral profile correlations.

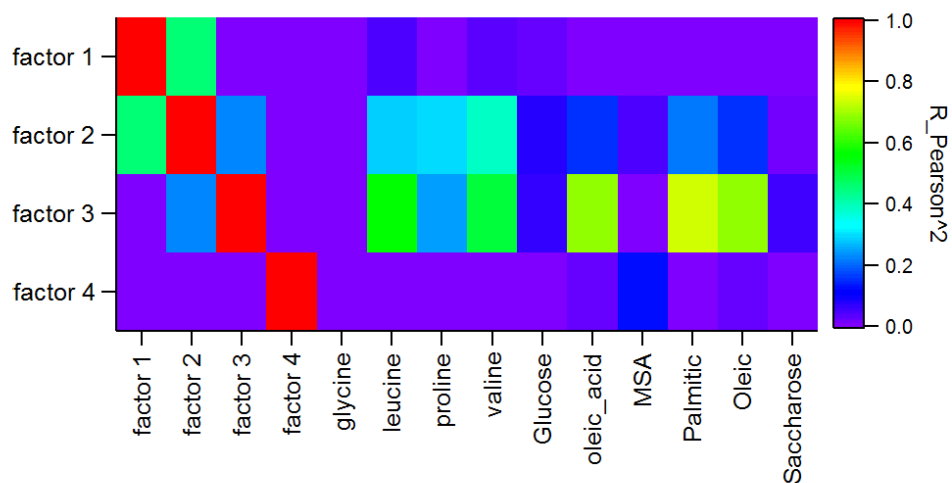

Figure S4: A four factor solution and the corresponding mass spectral profile correlations.

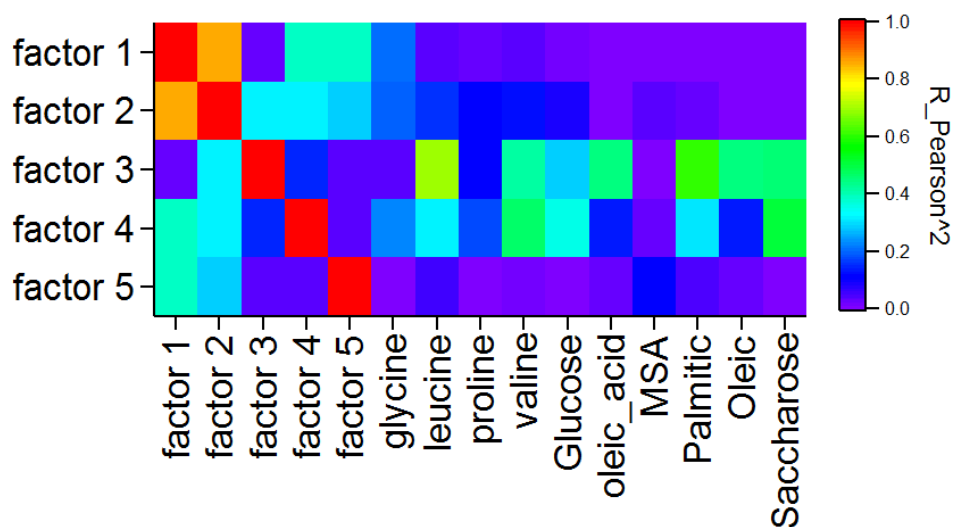

Figure S5: A five factor solution and the corresponding mass spectral profile correlations.

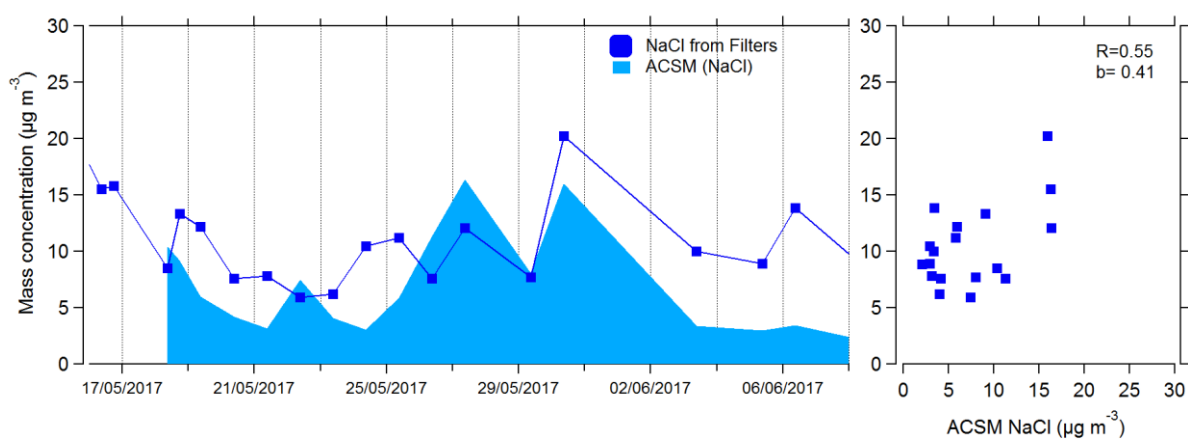

Figure S6. Comparison of NaCl mass concentration measured from filters and measured from ACSM mass spectra.

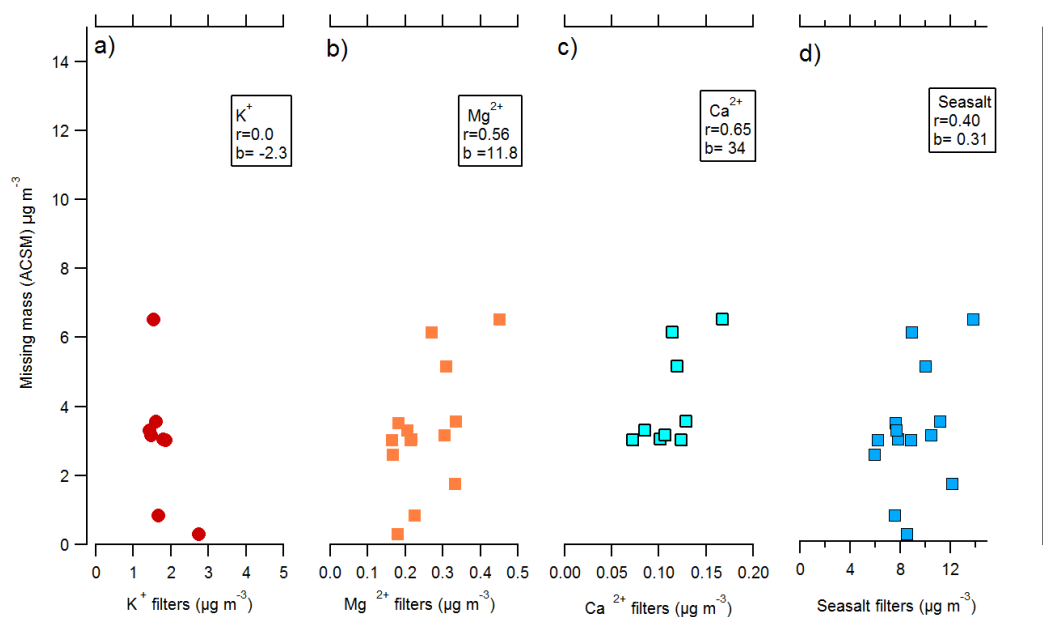

Figure S7: Comparison of the ACSM missing mass with a)  $\text{K}^+$ , b)  $\text{Mg}^{2+}$ , c)  $\text{Ca}^{2+}$ , d) NaCl mass concentrations determined from offline ion chromatography analysis.

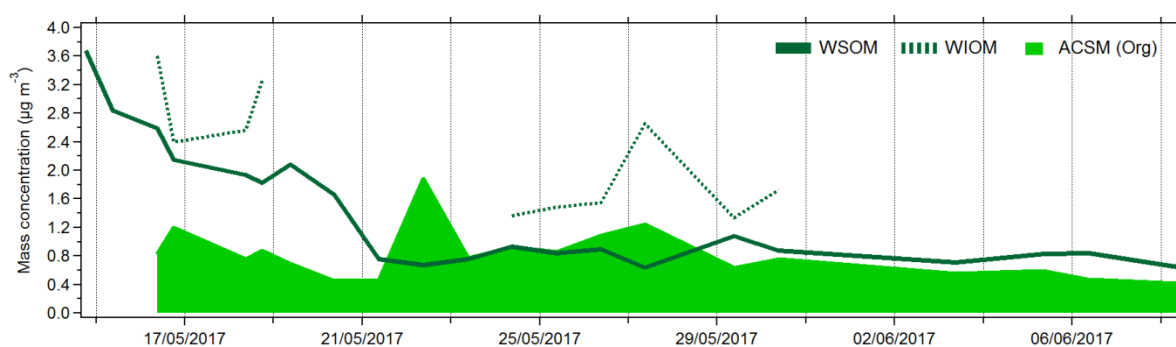

Figure S8: Comparison of organic aerosol measurement by the ACSM with water soluble and water insoluble organic matter (WSOM, WIOM) measured from filters.
